# Active Sinking Particles: Sessile Suspension Feeders significantly alter the Flow and Transport to Sinking Aggregates

Deepak Krishnamurthy <sup>\*,a,1</sup>, Rachel Pepper <sup>\*,b,1</sup>, Manu Prakash<sup>a</sup>

<sup>a</sup>Department of Bioengineering, Stanford University, Stanford, California, USA

<sup>b</sup>Department of Physics, University of Puget Sound, Tacoma, Washington, USA

\* Equal contribution

<sup>1</sup>To whom correspondence should be addressed;

E-mail: [dkrishnamurthy@schmidtsiencefellows.org](mailto:dkrishnamurthy@schmidtsiencefellows.org), [rpepper@pugetsound.edu](mailto:rpepper@pugetsound.edu)

August 5, 2021

## ABSTRACT

Sinking or sedimentation of biological aggregates plays a critical role in carbon sequestration in the ocean and in vertical material fluxes in waste-water treatment plants. In both these contexts, the sinking aggregates are “active,” since they are hot-spots of biological life and are densely colonized by microorganisms including bacteria and sessile protists, some of which generate feeding currents. However, the effect of these feeding currents on the sinking rates, trajectories, and mass transfer to these “active sinking particles,” has not previously been studied. Here we use a novel scale-free vertical-tracking microscope (a.k.a. Gravity Machine, Krishnamurthy et al. “Scale-free vertical tracking microscopy.” *Nature Methods* (2020)) to follow model sinking aggregates (agar spheres) with attached protists (*Vorticella convallaria*), sinking over long distances while simultaneously measuring local flows. We find that activity generated by attached *Vorticella* cause substantial changes to the flow around aggregates in a dynamic manner and reshape mass transport boundary layers. Further, we find that activity-mediated local flows along with sinking significantly changes how aggregates interact with the water-column at larger scales by modifying the encounter and plume cross-sections and by inducing sustained aggregate rotations. In this way our work suggests an important role of biological activity in understanding the growth, degradation, composition and sinking speeds of aggregates with consequences for predicting vertical material fluxes in marine, freshwater and man-made environments.

# 1 Significance Statement

2 Sinking aggregates are a critical part of aquatic ecosystems. Plentiful sinking aggregates  
3 account for the majority of carbon sequestration in the oceans. These aggregates are densely  
4 colonized by microorganisms, including many that generate feeding currents. Utilizing a  
5 novel instrument for high resolution imaging of sinking particles, we demonstrate that these  
6 feeding currents significantly change how water flows near the aggregates. We show that  
7 these changes in flow are likely to affect aquatic system processes, including aggregation  
8 rates, degradation rates, sinking speeds, and aggregate composition. Our work provides  
9 a starting point for exploring the larger-scale implications of attached organisms on these  
10 system processes, which, in turn, are critical for understanding carbon sequestration in the  
11 oceans or efficiency in waste-water treatment plants.

# 12 2 Introduction

13 Suspended aggregates are key parts of natural and man-made aquatic ecosystems. In partic-  
14 ular, macroaggregates ( $> 500 \mu\text{m}$ ), known as marine snow, lake snow, and river snow, can  
15 dominate nutrient, carbon, and element cycling in aquatic environments [1, 2, 3, 4, 5, 6, 7].  
16 In the ocean marine snow aggregates are primarily responsible for vertical material fluxes  
17 from the surface mixed layer to the deep ocean, thus playing a critical role in marine carbon  
18 sequestration [5, 1, 6]. Similar aggregates are also a key part of activated sludge wastewater  
19 treatment facilities, where the sinking out of flocs is one of the main methods for remov-  
20 ing organic debris and contaminants from the water [8]. Understanding aggregation rates,  
21 degradation rates, sinking speeds, and composition of aggregates in aquatic environments is  
22 critical for understanding vertical fluxes of carbon and nutrients in these diverse ecosystems  
23 [7, 1, 9]. These rates can in-turn depend on several biotic and abiotic factors. The local  
24 hydrodynamic environment is one such factor: encounter rates, which determine particle size  
25 distributions and sinking rates, can depend sensitively on fluid flow near the aggregate, e.g.,

26 local shear, or the flow regime (Reynolds number). [9, 10].

27 In marine, freshwater, and waste-water contexts suspended aggregates are biological hot-  
28 spots: they are highly enriched in carbon and other nutrients, compared to the surrounding  
29 water, and are, therefore, an important micro-habitat for aquatic organisms [11, 12, 13, 7,  
30 2, 14] (Fig. 1A, B, C). Marine and freshwater aggregates are typically densely colonized  
31 by bacteria, flagellates, ciliates, and are consumed by larger zooplankton [11, 15, 13, 7, 2].  
32 Similarly, wastewater flocs are also densely colonized by bacteria and protists [16]. Sessile  
33 ciliates attached to flocs are especially important for effective wastewater treatment, and the  
34 particular species composition is used as an indicator of the stage and health of the effluent  
35 [17, 16].

36 How does biological activity of a sessile attached feeder fundamentally alter the hydro-  
37 dynamic environment surrounding these sinking aggregates? Many of the organisms found  
38 on aggregates, including protists and nanoflagellates, generate a feeding current to draw  
39 in food from the surrounding fluid [15, 18, 13, 7]. These feeding currents can have veloci-  
40 ties on the same order as near-field flows due to sinking (typical feeding current velocities  
41  $0.1\text{--}1\text{mms}^{-1}$  [19, 20] and sinking speeds of aggregates  $\mathcal{O}(1\text{ mms}^{-1})$ ) [18]. We term these  
42 aggregates as “*active sinking particles*,” with the local flow fields determined both by sink-  
43 ing and biologically-generated flows. It is important to understand how this combination of  
44 sinking and biological activity affects mass transport, encounter rates with other aggregates,  
45 colonization of bacteria and other suspension feeders, as well as growth, degradation and  
46 sinking rates, yet these questions have not been systematically investigated so far. We have  
47 found only one study of this potentially-important phenomenon; the feeding currents  
48 of attached nanoflagellates was shown to dramatically increase aggregation rates for small  
49 ( $< 20\ \mu\text{m}$ ) particles, but direct measurement of flows are needed to confirm the mechanism  
50 and to extend to both larger organisms and larger aggregates [18].

51 The sinking and mass transport to “active sinking particles” in their ecological context is  
52 a complex, multi-scaled process. For instance, marine snow particles of size-scale  $\mathcal{O}(1\text{ mm})$



53 sink at rates of  $\mathcal{O}(100 \text{ m/day})$  while undergoing myriad transformations due to both physical  
54 and biological influences [21, 22, 5]. *In situ* measurements of such processes are naturally  
55 challenging, and earlier efforts in the laboratory have used techniques including tethering  
56 aggregates and using a fixed background flow to simulate freely sinking conditions [6, 23].  
57 However, practical constraints posed by these experimental setups have made it challenging  
58 to bring modern microscopy techniques into the realm of this problem. Direct, real-time  
59 observations of near-field flows (single cell to aggregate scale), as well as dynamics of freely  
60 sinking aggregates, over both short and long time-scales, are currently lacking.

61 In this work, we present a novel experimental system and measurements combining agar  
62 aggregates colonized by *Vorticella convallaria* (our model “active sinking particles”), and  
63 Scale-free Vertical Tracking Microscopy, aka Gravity Machine [24]. This recent advance  
64 in tracking microscopy allows freely-sinking particles to be automatically tracked using a  
65 circular “hydrodynamic treadmill.” Using this novel method we present the first detailed  
66 measurements and characterizations of near-field flows around “active sinking particles” and  
67 find that they can be significantly modified by the presence of one or more *Vorticella* cells.  
68 We also find that *Vorticella* modify aggregate dynamics by causing sustained rotations, with  
69 implications for mass transport and aggregate transformations over long times. Finally, we  
70 show how the presence of one or more *Vorticella* can affect aspects of mass transport to the  
71 aggregate including the encounter region and plume cross-sections, important parameters in  
72 estimating mass transport and aggregate growth and degradation rates. Overall, our work  
73 introduces a new experimental method allowing novel multi-scale measurements of “active  
74 sinking particles,” and highlights the importance of biological activity in shaping the near-  
75 field flows and mass transport to sinking aggregates.

## 76 **3 Results**

### 77 **3.1 Conceptual framework**

78 Active sinking particles lie on the continuum spanned, on the one hand, by passive sinking  
79 particles that have no biological activity, and, on the other, by active swimmers under gravity  
80 (Fig. 1). This continuum can be parameterized by a non-dimensional ratio of forces due to  
81 activity and buoyancy:  $F_{active}/F_g = n\epsilon F/\Delta\rho Vg$ . The buoyancy force due to gravity depends  
82 on the density mismatch between the particle and ambient fluid  $\Delta\rho$ , the particle volume  $V$   
83 and the acceleration due to gravity  $g$ . The force from biological activity depends on  $n$ , the  
84 number of active force-generating units on the particle (these can be individual cells like the  
85 *Vorticella* considered here or force generating organelles like cilia),  $F$ , the magnitude of the  
86 force exerted by each unit,  $\epsilon$ , a number between zero and one that characterizes the alignment  
87 of the forces exerted by individual organisms (or cilia) on the fluid ( $\epsilon = |\sum_i^n \mathbf{p}_i|/n$ , where  
88  $p_i$  is orientation). Using this parametrization, passive sinking particles have  $F_{active}/F_g = 0$ ,  
89 active swimmers are typically characterized by  $F_{active}/F_g \gtrsim 1$ , while active sinking particles  
90 have  $0 < F_{active}/F_g \lesssim 1$  (Fig. 1D).

### 91 **3.2 Experimental system**

92 To study the multi-scale process of microscale near-field flows and macroscale sinking dynam-  
93 ics we leveraged Scale-free Vertical Tracking Microscopy (SVTM) [24] that uses controlled  
94 rotation of a circular “hydrodynamic treadmill” to automatically keep small objects centered  
95 in the microscope field-of-view while allowing free movement with no bounds along the axis  
96 of gravity (Fig. 2A). SVTM allowed us to concurrently measure aggregate trajectories over  
97 meters (Fig. 2B), and capture images through video-microscopy at rates of 100 frames/s,  
98 (Fig. 2C, Movie S1). The optical resolution of the imaging system was  $\approx 1\mu m$ , thus enabling  
99 resolution of flows and dynamics at the scale of single-cells colonizing the aggregate (Fig. 2  
100 D). We observed sinking spherical millimeter-scale aggregates that were either bare or had

101 one to several attached *V. convallaria*, a common species of sessile ciliates (see Materials and  
102 Methods for further details). *Vorticella* species are found abundantly on sinking aggregates  
103 in marine, freshwater, and man-made ecosystems [15, 16]. We then measured flow around  
104 active sinking particles using Particle Image Velocimetry (PIV) and particle pathline traces  
105 on short video segments (see Materials and Methods for further details).

### 106 **3.3 *Vorticella* modify near-field flow and reshape boundary-layers**

107 Attached *Vorticella* substantially changed the flows near sinking aggregates in ways that were  
108 variable and depended sensitively on the location and orientation of the attached organisms  
109 (representative examples in Fig. 3; all measured flow fields in [Supplementary Fig. 1](#); N=12).  
110 A typical bare aggregate had relatively smooth flow (Fig. 3A,B) and both perpendicular  
111 and parallel flow near the particle that was similar the predictions of flow at zero Reynolds  
112 number around a sphere of the same size (Fig. 3C, Movie S2). As expected, tangential flow  
113 was fastest at the equator, and radial flow was fastest at the poles (Fig. 3C).

114 On the other hand, Fig. 3 also shows two aggregates, each with three *Vorticella* attached,  
115 where the flow was modified by the *Vorticella*. In Fig. 3D,E,F, the modifications were  
116 somewhat subtle: streamlines were pulled toward the *Vorticella*, disrupting the background  
117 flow (Fig. 3D,E, Movie S3). The *Vorticella* in the bottom left, which was pulling fluid  
118 towards the particle, increased the radial flow, and caused the tangential flow to be reduced  
119 on one side of the organism and enhanced on the other side (Fig. 3F). The *Vorticella* near  
120 the north pole changed the local flow from primarily radial to primarily tangential (Fig. 3F).  
121 Since the *Vorticella* altered the flow velocities and gradients near the sphere, they caused the  
122 boundary layer to be thicker in some regions of the sphere (where velocities were reduced),  
123 and to be thinner in others (where velocities were increased). These changes were more  
124 substantial and wide spread than smaller scale changes induced by irregularities on the  
125 surface of a bare aggregate (Fig. 3C). In Fig. 3G,H,I, the modifications to the flow by the  
126 *Vorticella* were more dramatic: *Vorticella* on this aggregate caused large-scale eddies, which

127 changed the flow structure, completely altering tangential and radial flow velocities near the  
128 sphere (Fig. 3G,H,I, Movie S3). In some regions, the flow direction was even reversed from  
129 what it would have been for a bare sinking aggregate (Fig. 3I). Again, the boundary layer  
130 near this sphere was substantially re-shaped in ways that would likely change both total  
131 mass transport to the sphere and which regions of the sphere have the highest rates of mass  
132 transfer. Such diversity of flow structures caused by *Vorticella* feeding flow is similar to that  
133 observed and predicted previously for *Vorticella*, and similar organisms, attached to surfaces  
134 and in ambient flow [25, 20, 26, 27].

135 To understand the relative effects of activity and sinking on mass transport from the  
136 aggregates, we can compare their relative contributions to the velocity within the mass  
137 transport boundary-layer. Advective effects of the flow dominate diffusive effects for the  
138 range of aggregate sizes, sinking speeds and even for transport of small molecules such as  
139 oxygen from the aggregate (Materials and Methods). This implies that the non-dimensional  
140 Péclet number ( $Pe = Ua/D$ ), which quantifies the relative importance of these effects,  
141 is much greater than 1 (Materials and Methods). Here,  $U$  is velocity scale of the flow,  
142  $a$  the aggregate radius and  $D$  the diffusivity of the molecule of interest. At such high  
143 Péclet number, the mass transport boundary layer is a thin region near the aggregate whose  
144 thickness is  $\sim aPe^{-1/3}$  [28]. The hydrodynamic effect of *Vorticella* on the fluid can be  
145 modelled as a point-force of magnitude  $F$  at a height  $h$  above the boundary [27]. The  
146 velocity scale due to *Vorticella* within this boundary layer is then  $F/\mu h$ . On the other hand,  
147 the velocity scale within the boundary layer due to sinking is  $\mathcal{O}(UPe^{-1/3})$ . Comparing these  
148 two scales in the vicinity of a *Vorticella* cell we obtain a critical sinking speed that separates  
149 the “activity-controlled” and “sinking-controlled” mass transport regimes:

$$U_{critical} = \left(\frac{F}{\mu h}\right)^{3/2} \left(\frac{a}{D}\right)^{1/2}. \quad (1)$$

150 For sinking speeds above this scale, sinking is expected to dominate mass transport. Note  
151 that this picture is local, and the overall effect of the mass transport will depend on the

152 number of *Vorticella*, as well as their orientation relative to the sinking direction of the  
153 aggregate. For instance, when *Vorticella* are oriented parallel to the local flow they can  
154 cause local flow reversals that completely disrupt the boundary layer structure and cause it  
155 to lift-off the aggregate surface (see for eg. Fig. 3G,H). Based on the measured parameters  
156 for *Vorticella* ( $F = 200 \text{ pN}$ ,  $h \sim 100 \text{ }\mu\text{m}$ , [26]), aggregate size  $a = 0.5 \text{ mm}$ , and for  
157 transport of small-molecules like oxygen ( $D = 10^{-9} \text{ m}^2 \text{ s}^{-1}$ ), we obtain  $U_{critical} = 63 \text{ mm s}^{-1}$ .  
158 This number is much higher than the sinking speeds in our experiments (which in-turn are  
159 representative of sinking speeds of real aggregates), indicating that activity dominates mass  
160 transport locally.

### 161 **3.4 *Vorticella* modify encounter region and plume width**

162 The above changes in near-field flows and mass transport of sinking aggregates due to at-  
163 tached organisms will have implications for many important processes, such as aggregate  
164 coagulation and growth rates, resulting size and shape of aggregates, aggregate sedimen-  
165 tation rates, the nutrient environment for organisms living on the aggregate, the plume  
166 left behind the aggregate as it sinks, and thus, chemotaxis of organisms to the aggregate  
167 [9, 10, 1, 29, 30, 31, 32, 7]. A full understanding of changes to mass transport requires full  
168 3-dimensional flow fields and a numerical solution of the advection-diffusion equation (e.g.,  
169 [33]), which are beyond the scope of this investigation. However, our experimental flow mea-  
170 surements are a key missing first piece in this analysis [34]. These flow fields also allow us to  
171 determine directly some of the changes to aggregate encounter rates and to the plume left  
172 behind by the aggregate.

173 We find that attached *Vorticella* significantly modify both the region of encounter below  
174 sinking aggregates and the shape of the plume left behind (Fig. 4). The encounter region  
175 below a sinking aggregate is the volume of fluid where particles will, eventually, come in to  
176 contact with the aggregate as it falls through the water column; the size and shape of this  
177 region is important for determining particle aggregation rates [10]. The plume is a volume of

178 higher solute concentration left behind the aggregate as it sinks; bacteria and zooplankton  
179 may use the plume to find and colonize (or consume) sinking aggregates [6, 7, 32, 35, 36].  
180 We estimated the width of the plume left behind by the aggregate as well as the width  
181 of the encounter region below the aggregate by following streamlines in our measured flow  
182 field; we also calculated this region analytically for Stokes and Oseen flow (more details in  
183 Materials and Methods). Stokes flow is accurate for zero Reynolds number, while Oseen  
184 flow makes adjustments for Reynolds numbers close to one [37]. Our example aggregates  
185 show that bare spheres have encounter regions and plumes fairly close to those predicted  
186 by Stokes and Oseen flow (Fig. 4A), while those with *Vorticella* have plumes and encounter  
187 regions with significant asymmetry and that can be both narrower and wider than those  
188 of bare spheres (Fig. 4B-E). Changes are particularly dramatic when the *Vorticella* cause  
189 recirculation in the flow (Fig. 4C-E). When extrapolated to distances far from the sphere  
190 (more details in Materials and Methods), we find that the width of the region encountered  
191 by the sphere and the width of the plume left behind are significantly changed by attached  
192 organisms, and that these changes lead to both thicker and thinner plumes and wider and  
193 narrower encounter regions (Fig. 4F,G). Each of our measurements are at a single time point  
194 and measure a 2D cross-section of a 3D flow. It is, therefore, possible that, for instance, in  
195 some cases that attached *Vorticella* cause the plume to be thinner in one dimension while  
196 thicker in another. Also, these changes are likely to be dynamic in time, leading to, e.g.,  
197 a sometimes wider encounter region and sometimes narrower as time passes and *Vorticella*  
198 orientations and positions on the aggregate change.

We also used our long-distance encounter-width measurements (Fig. 4G) to predict how attached organisms change particle coagulation kernels. Particle encounter dynamics are included in aggregation models through these coagulation kernel that expresses encounter rate (in volume/time) [9]. The two most commonly used kernels are the rectilinear kernel:

$$\beta_{rec} = \pi(r_i + r_j)^2 |u_i - u_j| \quad (2)$$

and the curvilinear kernel:

$$\beta_{cur} = 0.5\pi r_j^2 |u_i - u_j|, \quad (3)$$

where  $r_i$  is the radius of the larger particle (here the sinking agar sphere),  $r_j$  is the radius of the smaller particle (here assumed to be 140 for simplicity - see Materials and Methods for further details), and  $u_i$  and  $u_j$  are the sinking speeds of the two particles [9]. The rectilinear kernel does not include any distortion of the flow due to the presence of particles, the curvilinear kernel is more accurate and is based on the assumptions of Stokes flow [9]. If we assume our long-distance encounter widths (Fig. 4F) are axisymmetric, our experimental kernels would have the form:

$$\beta_{exp} = \pi\lambda^2 |u_i - u_j|, \quad (4)$$

199 where  $\lambda$  is half of the encounter width shown in Fig. 4F. Using this formulation, we find that  
200 attached organisms lead to encounter kernels that are always smaller than the rectilinear  
201 kernel (Fig. 4H), and  $\sim 2\times$  to  $10\times$  the curvilinear kernel (Fig. 4I).

### 202 **3.5 *Vorticella* cause sustained rotation of aggregates**

203 Our novel experimental system enabled us to observe aggregates as they sank freely in the  
204 ambient fluid without the constraining influence of tethers or other attachments, required  
205 in earlier experimental systems [23]. We observed that freely sinking aggregates displayed  
206 sustained rotational motion correlated to the presence of *Vorticella* (Fig. 5A, Movie S5). To  
207 explore this quantitatively, we developed a custom image-processing pipeline (SI Section 1.2),  
208 and used tracked surface fiducial markers naturally occurring on the aggregates to estimate  
209 rotation rates and 3D rotation axes from the 2D images generated by SVTM. We find  
210 that aggregates without *Vorticella* show little to no rotation (Fig. 5A). On the other hand,  
211 aggregates colonized by one or more *Vorticella* show sustained rotations that are visible by  
212 eye even over a 30 s interval (Fig. 5B). To explore if the number of *Vorticella* was the main  
213 driver of this rotation, we isolated the effects of aggregate size on the observed rotation rates

214 by rescaling the rotation rate by the scaling factor  $\tilde{\Omega} = F_{vorticella}/8\pi\mu a^2$ , where  $F_{vorticella}$   
215 is the force-scale exerted on the fluid by a single *Vorticella* cell ( $\approx 200pN$  [27]),  $\mu$  the  
216 ambient fluid viscosity, and  $a$  the aggregate radius. This scaling factor corresponds to the  
217 theoretical rotation rate for a spherical aggregate with a single *Vorticella* oriented tangential  
218 to the aggregate surface. Upon rescaling, we find that the mean dimensionless rotation  
219 rates are higher for aggregates with *Vorticella* than for aggregates without (Fig. 5D; mean  
220 dimensionless rotation rate with no *Vorticella*:  $0.32 \pm 0.27$ , 1 to 3 *Vorticella*:  $0.53 \pm 0.27$ , and  
221 greater than 3 *Vorticella*:  $0.82 \pm 0.50$ , the differences in mean rotation rates were found to  
222 be statistically-significant based on the Kruskal-Wallis test  $\chi^2(3) = 257$ ,  $P < 10^{-6}$ ,  $N = 13$   
223 distinct aggregates). That the dimensionless rotation rate is  $\mathcal{O}(1)$  further indicates that  
224 *Vorticella* are indeed the driving factors behind the rotation (Fig. 5D, inset). We further  
225 confirmed that measured changes in rotation rates were best explained by *Vorticella* numbers  
226 and not due to other experimental conditions (Fig. Supplementary Fig. 2). Interestingly  
227 we found that not only does the mean rotation rate rise with *Vorticella* number, but the  
228 fluctuations about the mean do as well, with the distribution of higher *Vorticella* numbers  
229 becoming heavy-tailed (Fig. 5D and inset).

230 We also find that *Vorticella* induce rotations about specific axes that lie close to the axis  
231 of gravity, as evident in the distribution of the rotation axis over a unit sphere (Fig. 5C). The  
232 distribution is relatively uniform for the no *Vorticella* case, but with increased number of  
233 *Vorticella*, the distribution peaks along the axis of gravity ( $\theta = 0$ ). We interpret this result  
234 as occurring due to gravity breaking the symmetry in orientation space, wherein aggregates  
235 have a stable sedimentation orientation along the polar axis ( $\theta$ ) due to possible minute  
236 density and shape effects that provide a gyrotactic stabilization torque. Thus, the stochastic  
237 active torques due to *Vorticella* cause the aggregate to sample orientation space along the  
238 azimuthal direction ( $\phi$ ), as evidenced in our measurements.



## 239 4 Discussion

240 Our results suggest a new paradigm for how aquatic sinking aggregates interact hydrody-  
241 namically with their surroundings (Fig. 6). In the past, they have been viewed as passive  
242 particles, subject to the flow around them, whereas our results show that the flows generated  
243 by attached organisms change both aggregate local flow and sinking dynamics. This change  
244 is likely to affect every aspect of these particles, including mass transport, the chemical  
245 signature they leave in their wake, and the aggregation, dissolution, and settlement rates.

246 Previously, mass transport from small particles or aggregates has been studied in a wide  
247 range of flow conditions including uniform flow, shearing flows of different types and, finally,  
248 turbulent flow [28, 38, 39, 34]. These works point to the crucial importance of near-field  
249 streamline topology in determining mass transfer rates at high Péclet numbers. As shown in  
250 this work by direct observation, organisms can change the near-field flow structures signifi-  
251 cantly, with the flow topology being dependent on the orientation of the activity. This likely  
252 leads to a different mass transfer rate scaling than both passive sinking and active swimming  
253 particles which scale as  $Pe^{1/3}$  and  $Pe^{1/2}$ , respectively [28, 38].

254 The importance of attached organisms' flow-fields on mass transport was also recently  
255 studied in the case of organisms attached to stationary diatoms, wherein the activity induced  
256 flows significantly enhanced nutrient fluxes to a simulated diatom cell [33]. Further this  
257 enhancement was of a similar scale to that for sinking due to a similar density differential to  
258 our particles, hence supporting our finding that even a few attached organisms could change  
259 the mass transport characteristics of sinking aggregates. We, thus, anticipate that future  
260 investigations of the details of combined advection and diffusion to active sinking particles,  
261 and the resulting mass transport rate scaling, may reveal a complex interplay between the  
262 two sources of advective transport.

263 The above changes to mass transport rates would affect how active sinking particles  
264 interact with the water column at larger scales. One example of this would be through  
265 the plume left behind the particle. Such plumes are an important source of nutrients for

266 microbial life in the water-column and may attract both bacteria [32] and larger organisms  
267 like copepods to sinking particles [7, 35, 36]. As shown here, activity significantly modifies  
268 the plume cross-section, thus impacting the chances of encounter by bacteria and copepods.  
269 In the future, direct visualization of the plume using fluorescent dyes and SVTM in both  
270 model and natural aggregates would be an interesting study.

271 Another example of changes to particles' interaction with the water column at larger  
272 scales is mediated by changes to encounter rates. Studies have shown that changes in near  
273 field flows can substantially change encounter rates of sinking aggregates with each other  
274 [9, 10]. When combined with coagulation models, moderate changes in encounter dynamics  
275 can have large-scale changes on the size spectrum of sinking aggregates as a function of  
276 depth [29, 30]. Changes in this size spectrum further significantly change model predictions  
277 of carbon sequestration and export to the deep ocean, as well as biogeochemical and trace  
278 element distributions in aquatic ecosystems [9, 29, 30]. We find that attached organisms  
279 lead to encounter kernels that are always smaller than the rectilinear kernel, and  $\sim 2\times$  to  
280  $10\times$  the curvilinear kernel. Experimental measurements of particle encounter rates indicate  
281 that true coagulation kernels are, indeed, between the rectilinear and curvilinear kernels  
282 [40, 41, 9]. This discrepancy has been attributed to porosity, fractal geometry, and interme-  
283 diate Reynolds number flow [40, 41, 10]. However, our results show that flow from attached  
284 organisms could also be a key explanatory factor for this discrepancy. Thus, fully account-  
285 ing for organism-generated flows may be important for creating accurate models of particle  
286 encounters and size spectra in aquatic ecosystems.

287 Attachment to sinking aggregates also likely affects the feeding rates of attached organ-  
288 isms. Attaching to a sinking aggregate provides organisms with an environment enhanced in  
289 food [12, 13, 7, 2, 14] and also changes the hydrodynamics of feeding and organism clearance  
290 rates [42, 43]. Previous work with *Vorticella* attached to stationary flat surfaces, showed  
291 that ambient flows increase or decrease clearance rates depending on organism orientation  
292 relative to flow [27]. While active sinking particles have more complex ambient flow, we sim-

293 ilarly observed a diversity of flow speeds and structures near individual *Vorticella*, depending  
294 sensitively on the location and orientation of the organisms. This likely leads to clearance  
295 rates that are both greater and less than those for organisms on stationary surfaces and that  
296 are changing in time as aggregate and organism orientation change.

297 The activity-induced aggregate rotations discovered in our work mean that the near-  
298 field streamline structures are dynamic in nature. This implies that all of the above effects,  
299 including mass transport rates as well as plume and encounter widths, are expected to  
300 be dynamic as well. This has interesting parallels to the effects of sub-Kolmogorov scale  
301 eddies on particles [39] and sinking aggregates [31], wherein turbulence induced rotations and  
302 modifications to the flow around particles can have a substantial effect on mass transport.  
303 To understand the relevance of these activity-induced rotations in an ecological setting of  
304 the ocean, we can compare the rotation rates from our measurements to those induced  
305 by turbulence. The scale of rotation rates seen in our measurements are  $F_{vorticella}/8\pi\mu a^2 \approx$   
306  $0.03s^{-1}$  (for  $a = 0.5mm$  and  $F_{vorticella} = 200pN$ ). This corresponds to a velocity gradient due  
307 to a turbulence intensity of  $10^{-9} W/Kg$ . Compared to turbulence intensities measured in the  
308 upper layers of the ocean (away from breaking waves) which range from  $10^{-10}$  to  $10^{-6} W/kg$   
309 [44, 45], these activity induced orientation changes may be an important source of orientation  
310 stochasticity in the ocean, especially for smaller, more densely colonized aggregates. While  
311 outside the scope of this work, our ongoing efforts seek to understand the nature of these  
312 dynamics and estimates of the time-averaged mass transport rates, encounter and plume  
313 cross-sections. These estimates would then allow connections between lab measurements  
314 and ecosystem scale models.

315 While our results clearly show that attached organisms fundamentally change how sinking  
316 aggregates interact hydrodynamically with their environment, our work is just the begin-  
317 ning in understanding both the details of this change and its full implications. Our results  
318 are 2D cross-sections of a complex 3D flows; understanding the full 3D flow either through  
319 experiment or theory/simulations is an important next step. Indeed, this is possible within

320 the framework of SVTM by leveraging volumetric imaging techniques. Further, we study  
321 one size class of sinking aggregate with attached *Vorticella*. Both larger and smaller ag-  
322 gregates are plentiful and important in aquatic ecosystem; similarly, smaller nanoflagellates  
323 are abundant on sinking aggregates and generate feeding flows on a smaller scale. Explor-  
324 ing these effects of size scaling of the organisms as well as aggregates is another important  
325 area for future investigation. Further, our aggregates, while ideal for a first examination,  
326 may be different than real aggregates in several ways. It would be interesting and relevant  
327 to investigate how feeding currents of attached organisms interact differently with fractal  
328 and irregular aggregates as well as porous aggregates. Our experimental measurements can  
329 also serve to validate future flow simulations which can then be used in advection-diffusion  
330 models to more fully explore the effects of attached organisms on mass transport to sinking  
331 aggregates.

332 It has recently become increasingly clear that understanding micro-scale processes in  
333 aquatic systems is critical for accurately understanding ecosystem level processes [7, 46, 47,  
334 48]. Our results show that it is critical to understand the near-field flow contributions of  
335 attached organisms in order to accurately predict the role of sinking aggregates in aquatic  
336 ecosystems. By modifying encounter rates, attached organisms may help determine the  
337 particle size spectrum of sinking aggregates, and, thus, the many ecosystem processes medi-  
338 ated by aggregates. Similarly, by changing mass transport rates and plume characteristics,  
339 attached organisms may modify the composition of bacterial, nanoflagellate, and protist  
340 communities living on these aggregates, with follow-on affects on the balance of remineral-  
341 ization and sinking, and, therefore, the export rates of carbon and other nutrients to the  
342 deep ocean.

## 343 5 Materials and Methods

### 344 5.1 Model sinking aggregates

345 We created simple model aggregates that share many of the properties of natural aggregates.  
346 In nature, macroaggregates are composed of aggregated biological and other debris and  
347 range in size from 0.5 mm to several centimeters [1, 5, 2]. Aggregates are typically smaller in  
348 estuaries and other areas of high shear ( $< 2$  mm) [2]. In all aquatic environments, aggregates  
349 are amorphous and fragile, have varied shapes, and are typically highly porous [1, 5, 6, 2].  
350 Aggregate sinking rates range from less than  $1 \text{ m day}^{-1}$  to hundreds of  $\text{m day}^{-1}$ , with larger  
351 particles sinking faster [5, 2].

352 We created approximately-spherical particles from 0.3% agarose gel by dripping hot agar  
353 into a layer of oil as described in Cronenberg *et al.* [49]. We used vegetable oil rather than  
354 kerosene and also made particles of various sizes by directly touching drops to the oil surface  
355 while still attached to the syringe needle tip. This density of gel resulted in spheres that  
356 sank at velocities within the range observed for similarly-sized marine snow [5]. We next  
357 incubated these gel particles overnight in cultures of *V. convallaria*, which were cultured  
358 as described in Vacchiano *et al.* [50]. We determined the number of *Vorticella* cells per  
359 aggregate by counting them in the microscopy images obtained during Scale-free Vertical  
360 Tracking Microscopy.

### 361 5.2 Flow measurement

362 We measured flow around active sinking particles using Particle Image Velocimetry (PIV) on  
363 short video segments. The water surrounding the spheres was seeded with  $2 \mu\text{m}$  polystyrene  
364 spheres (Polysciences 19814). PIV analysis was performed using PIVlab [51]. The aggregates  
365 were masked manually; we then used a multi-pass PIV algorithm with decreasing size of the  
366 interrogation windows from  $128 \times 128$  pixels to a final window size of  $64 \times 64$  pixels with  
367 50% overlap. Flow fields were then time-averaged over the length of the video (typically,

368 between 1-2 s).

369 We selected a subset of our particles to analyze that were either bare of *Vorticella*, or  
370 that had *Vorticella* in focus and with feeding current primarily directed in the focal plane.  
371 We also chose to analyze only video segments where the focal plane coincided with the center  
372 of the aggregate in the depth dimension. These choices minimized out of plane flow, so that  
373 most of the flows of interest could be measured. As a result of these choices, we analyzed flow  
374 fields for 12 video segments across 7 different aggregates (details in SI section Section 1.1).  
375 Aggregates ranged in diameter from 0.70 mm to 1.2 mm (mean of 0.97 mm), had sinking  
376 speeds of 0.2 mm/s to 5 mm/s (mean of 3 mm/s), and Reynolds numbers of 0.2 to 0.5 (mean  
377 of 0.3). Details of each aggregate are in SI Section 1.1, and PIV results for all measured flow  
378 fields are available in the Dryad data repository [52].

379 For obtaining particle pathlines The images were first registered using the Registration  
380 plugin in ImageJ [53] to stabilize small movements relative to the camera. The pathlines  
381 were then obtained using the FlowTrace plugin for ImageJ [54] by taking the maximum  
382 intensity projection of images over a 1 second interval.

### 383 **5.3 Widths of encounter region and plume**

384 Using our measured flow fields, we estimated the width of the plume left behind by the  
385 aggregate as well as the width of the encounter region below the aggregate by following  
386 streamlines in our measured flow field. This is a reasonable first approach, because the Péclet  
387 number ( $Pe$ ) for these processes is much greater than one, indicating that flow dominates over  
388 diffusion in most situations. In the plume, concentrations of small molecules like oxygen and  
389 organic solutes, as well as of motile and non-motile bacteria can be increased or decreased  
390 by the presence of the aggregate. Diffusion constants for these can range from  $10^{-9}$  m<sup>2</sup>/s  
391 (for oxygen and organic solutes) to  $10^{-14}$  m<sup>2</sup>/s (for large non-motile bacteria), with motile  
392 bacteria falling in between [6, 26, 55]. Therefore, plume Péclet numbers for our aggregates  
393 are  $\approx 150$  to  $10^7$ . The Sherwood number, defined as the ratio of total mass transport to

394 mass transport from diffusion alone is also an important indicator of the relative importance  
395 of advection and diffusion around a sinking aggregate. For bare sinking spheres of similar  
396 Reynolds number to ours, the Sherwood number is 5 for  $Pe \mathcal{O}(10^2)$  and 10 for  $Pe \mathcal{O}(10^4)$ ,  
397 again indicating that advection dominates over diffusion [6].

398 When considering the encounter region below the sphere, advection is even more domi-  
399 nant, and the Péclet number even higher. For instance, considering the encounter rate with  
400 a 100  $\mu\text{m}$  sphere, the Stokes-Einstein relation gives  $D = 2 \times 10^{-15} \text{ m}^2/\text{s}$  with a resulting  
401 Péclet number of  $10^8$  [56].

402 When finding the plume width, we started streamlines in a ring around the aggregate  
403 at a distance of 140  $\mu\text{m}$  from the aggregate surface and integrated forward in time in the  
404 measured flow field (Fig. 4). Streamlines that approached within 16 pixels (35  $\mu\text{m}$ ) of the  
405 aggregate surface were terminated, as the flow field measurement is noisy in this region. The  
406 width of the plume at each height above the aggregate is the distance between the outer-  
407 most streamlines. Here, choosing a distance of 140  $\mu\text{m}$  from the aggregate surface can be  
408 considered choosing an approximate diffusion constant for the substance of interest: from a  
409 scaling perspective, the substance will diffuse approximately 140  $\mu\text{m}$  in the time it takes the  
410 aggregate to sink its own diameter. This yields  $D \sim 10^{-9} \text{ m}^2/\text{s}$ , appropriate for oxygen or  
411 small organic solutes.

412 Similarly, we estimated the width of the encounter region below the aggregate, following  
413 the ideas in Humphries *et al.* [10]. Particles within this region of fluid would come in to  
414 contact with the aggregate as it falls through the water column. Similar to our plume cal-  
415 culation, we determined streamlines that began in a ring around the aggregate at a distance  
416 of 140  $\mu\text{m}$  from the aggregate surface. To find the encounter region, we then integrated  
417 backward in time in the measured flow field. The width of the encounter region is the dis-  
418 tance between outer-most streamlines (equivalent to  $2 \times \lambda$  in Humphries *et al.* Fig. 2 [10]).  
419 Choosing a beginning location of 140  $\mu\text{m}$  from the aggregate surface effectively gives the  
420 encounter region for particles in the water column that are 140  $\mu\text{m}$  or larger.

421 We compared our measured plume and encounter region widths to the known results for  
422 Stokes flow and Oseen’s modification to Stokes flow ([37] eqns. 4.9.12 and 4.10.3), where the  
423 Oseen flow was calculated for Reynolds numbers that matched parameters for each individual  
424 aggregate (see SI Table 1).

425 For more direct comparison with work such as Humphries *et al.* and with theoretical  
426 coagulation kernels [9, 10], we extended our experimentally measured streamlines beyond  
427 the field of view of our experiments to a final vertical distance above and below the sphere  
428 of 20 times the particle radius ( $20a$ ) using Oseen flow around a sinking sphere. We began  
429 the theoretical streamlines at the location of our experimentally-measured streamlines when  
430 they were a vertical distance of  $2a$  above or below the middle of the sphere (above for plume  
431 measurements and below for encounter region). The width of the plume at  $20a$  was, then,  
432 the distance between the outer-most theoretical streamlines. These long-distance widths  
433 were only calculated for particles where the distance  $2a$  was in the field of view ( $N=9$  for  
434 encounter volume and  $N=10$  for plume).

## 435 **Authors’ Contributions**

436 D.K., M.P, and R.E.P. designed research; D.K and R.E.P. carried out experiments; D.K.  
437 and R.E.P. carried out the analysis. D.K. and R.E.P. wrote the paper with comments from  
438 M.P.

## 439 **Data Availability**

440 Original PIV flow field data for all included flow fields are available in the Dryad data  
441 repository [52].



## 442 **6 Acknowledgements**

443 We thank Rebecca Konte for graphics and artwork in Fig.1 and 6. We are grateful to A.  
444 Andersen, E. Riley, and T. Kiørboe for helpful discussion. We also thank Rahul Chajwa,  
445 Hongquan Li and Prakash Lab members for valuable discussions. D.K acknowledges support  
446 from Bio-X fellowship and Schmidt Science Fellowship. We thank Hopkins Marine Station for  
447 lab-space for experiments. We are also grateful for support from NSF grant # IOS-1755326  
448 to REP. M.P. acknowledges financial support from NSF Career Award, Moore Founda-  
449 tion, HHMI Faculty Fellows program, NSF CCC (DBI-1548297) program, NSF Convergence  
450 Award (OCE-2049386), Schmidt Foundation and CZ BioHub Investigators program.

451 **Figures**

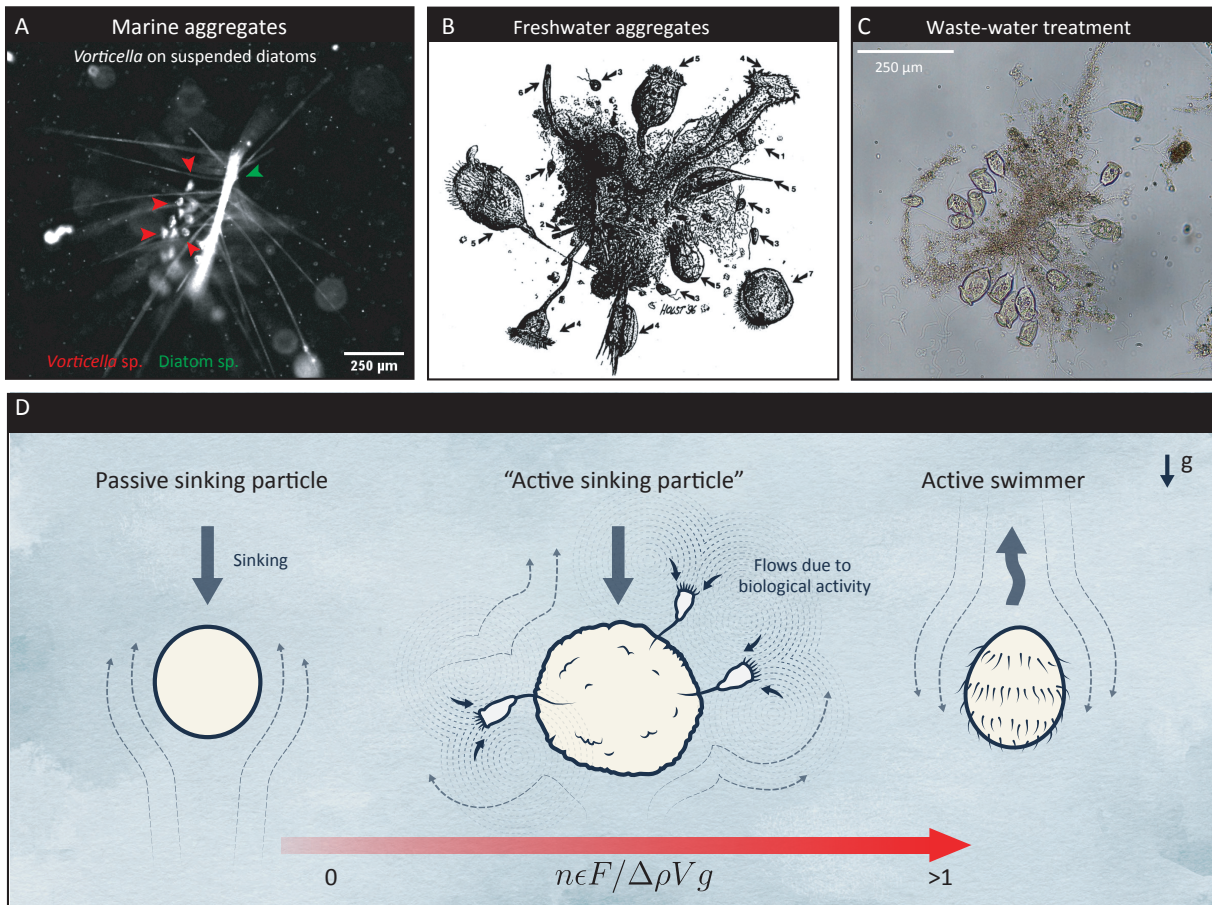

**Figure 1**

452 **Figure 1: “Active sinking particles” in natural and man made ecosystems. (A)**  
453 A snapshot of a natural marine aggregate including a diatom chain (red arrows) colonized  
454 by suspension feeders (green arrows). **(B)** A freshwater aggregate colonized by various sus-  
455 pension feeders including *Vorticella* species, *Stentor coeruleus*, and flagellates, such as *Bodo*  
456 species [15]. Image from Zimmerman-Timm *et al.* [15]. **(C)** An aggregate from the Tacoma  
457 Central waste-water treatment plant showing dense colonization by suspension feeding mi-  
458 croorganisms. **(D)** The examples in (A), (B) and (C) constitute “active sinking particles”  
459 wherein the aggregate’s flow and mass transport characteristics have contributions both due  
460 to sinking as well as the active flows created by sessile microorganisms.

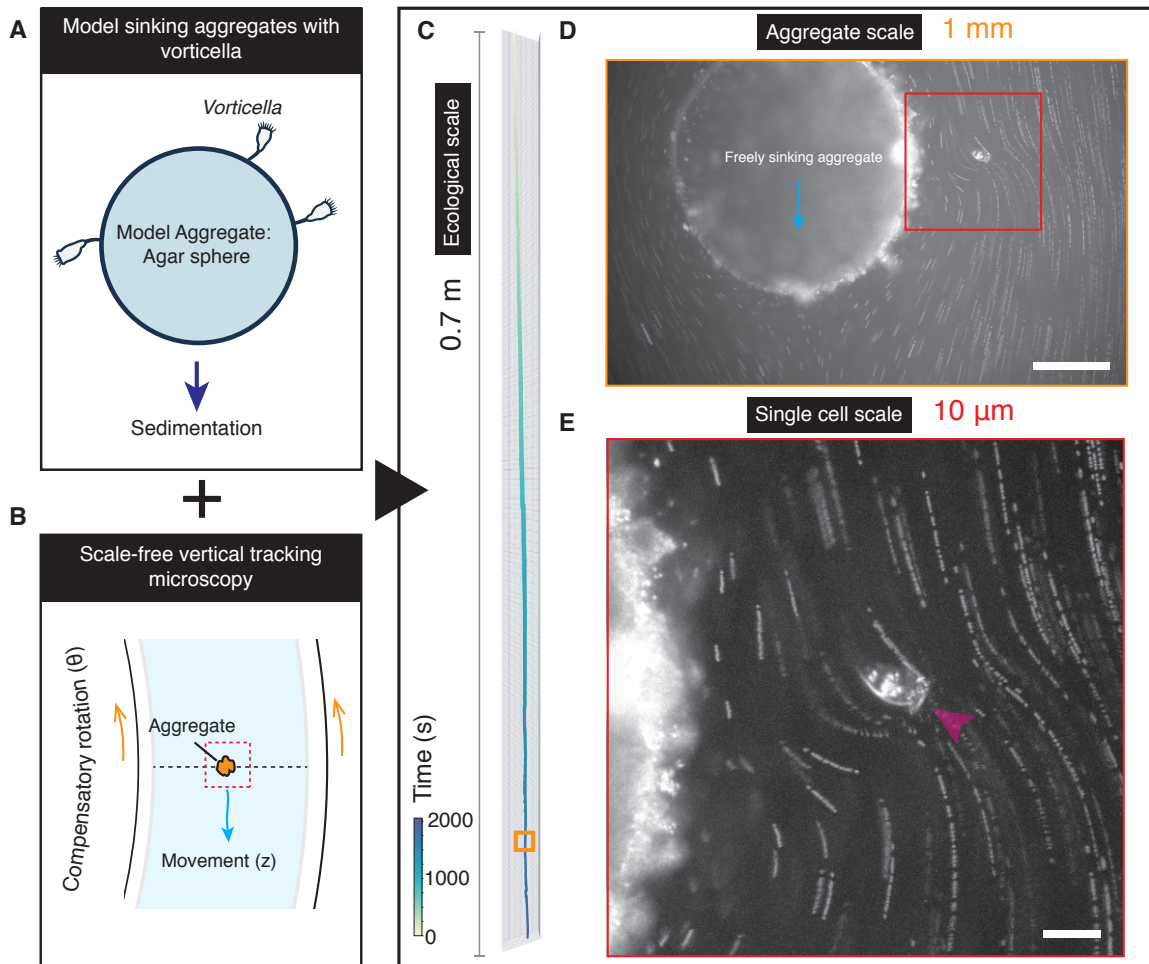

Figure 2

461 **Figure 2: Scale-free Vertical Tracking Microscopy of freely sinking model**  
462 **aggregates with attached *Vorticella*.** (A) Scale-free Tracking Microscopy using a “hy-  
463 drodynamic treadmill” allows multi-scale tracking of aggregates: observations are made at  
464 microscale resolution while concurrently allowing free sinking and tracking over macro-scales.  
465 (B) Model sinking aggregates comprising of agar spheres of radius  $0.5\text{ mm}$ , and sedimen-  
466 tation speed of  $\approx 1\text{ mm s}^{-1}$ , colonized by *V. convalaria*. (C) A typical 3D trajectory of an  
467 aggregate showing sinking over 0.7 meters in 33 mins. In general this multi-scale tracking  
468 method results in tracks where the spatio-temporal resolution is microns and milliseconds  
469 while the track extends over meters and hours. (D) Concurrent microscopy images of the  
470 aggregate captured in real-time at a rate of 30 Hz showing the aggregate and sessile sus-  
471 pension feeder (red box). (E) Close-up view of the *Vorticella* cell demonstrating the fine  
472 optical resolution of the system. Arrow indicates the orientation of the cell and equivalently  
473 the direction in which stress is applied to the fluid.



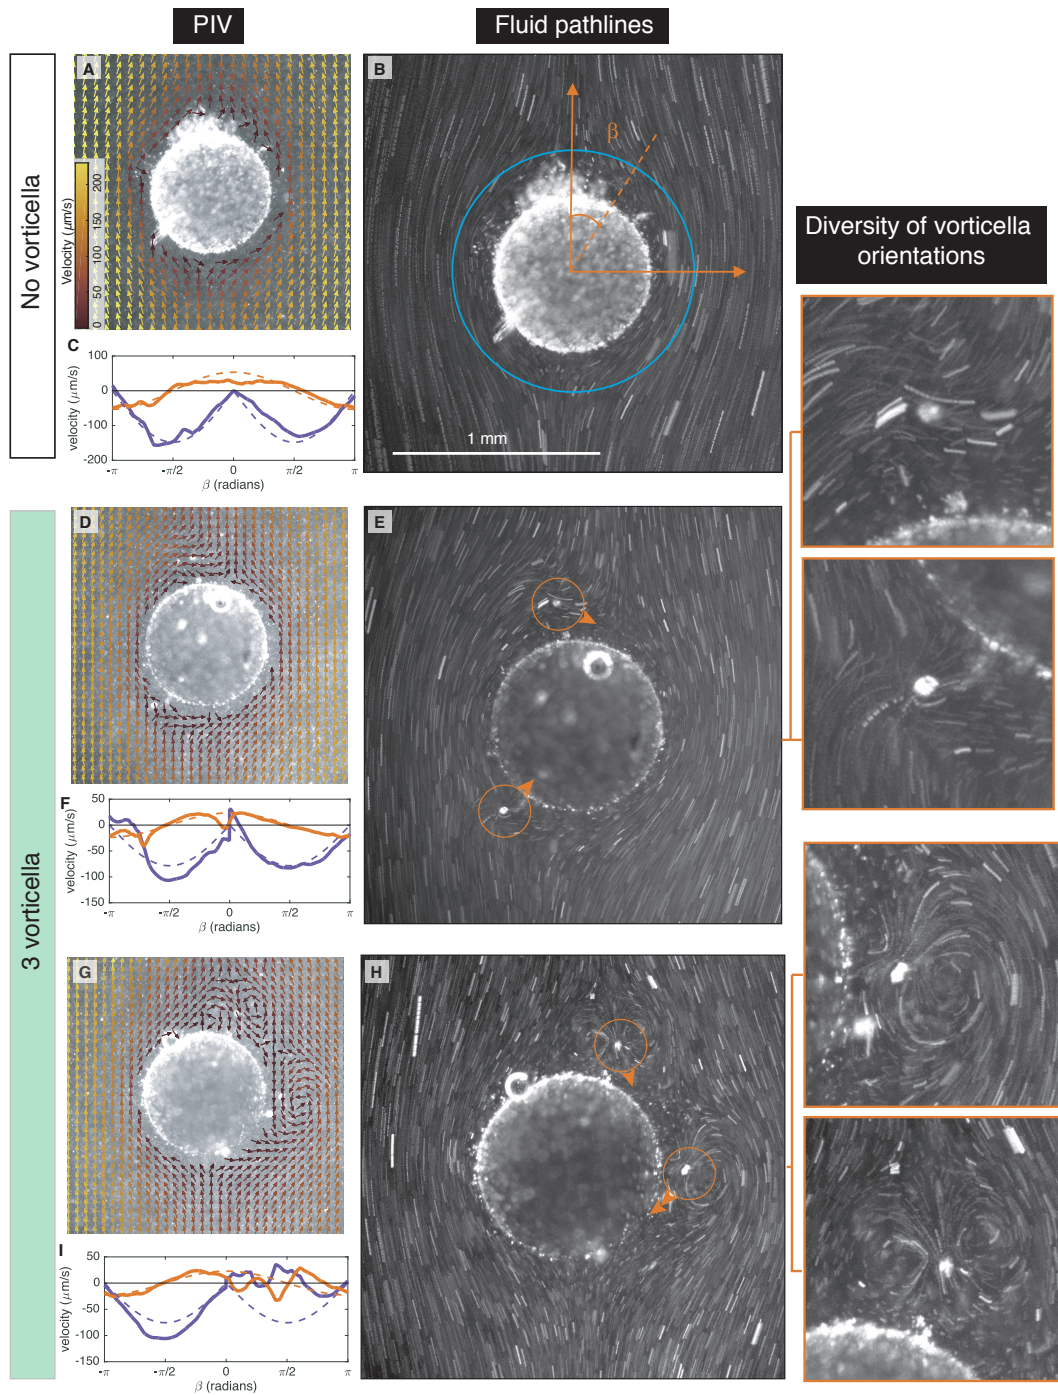

Figure 3

474 **Figure 3: Flow around active sinking aggregates.** Each row has measurements  
475 for a different sinking aggregate. **(A,D,G)** Measured flow velocities. Arrows indicated flow  
476 direction and color indicates speed. **(B,E,H)** Streaklines formed from tracer particles over  
477  $\approx 1$  s. Circles indicate location of *Vorticella* and arrows indicated the direction of *Vorticella*  
478 forcing. **(C,F,I)** Measured velocities (solid lines) along a circle 200  $\mu\text{m}$  from the sphere  
479 surface (e.g. blue line in panel (V)).  $\beta$  is the polar angle indicated in panel (V), and is positive  
480 to the right of the sphere and negative to the left. Perpendicular and parallel components  
481 of the velocity are relative to the sphere surface. Dashed lines are calculated velocities for  
482 Stokes flow (zero Reynolds number) around a sphere. **Aggregate 1; top row; A-C:** No  
483 attached *Vorticella*;  $a = 380 \mu\text{m}$ ;  $U = 340 \mu\text{m/s}$ ;  $\text{Re} = 0.3$ . **Aggregate 2; middle row;**  
484 **D-F:** Three attached *Vorticella* (one out of view);  $a = 490 \mu\text{m}$ ;  $U = 200 \mu\text{m/s}$ ;  $\text{Re} = 0.2$ .  
485 **Aggregate 3; bottom row; G-I:** Three attached *Vorticella*;  $a = 490 \mu\text{m}$ ;  $U = 210 \mu\text{m/s}$ ;  
486  $\text{Re} = 0.2$ . Representative snapshots of other experimentally-measured flow fields are shown  
487 in [Supplementary Fig. 1](#).

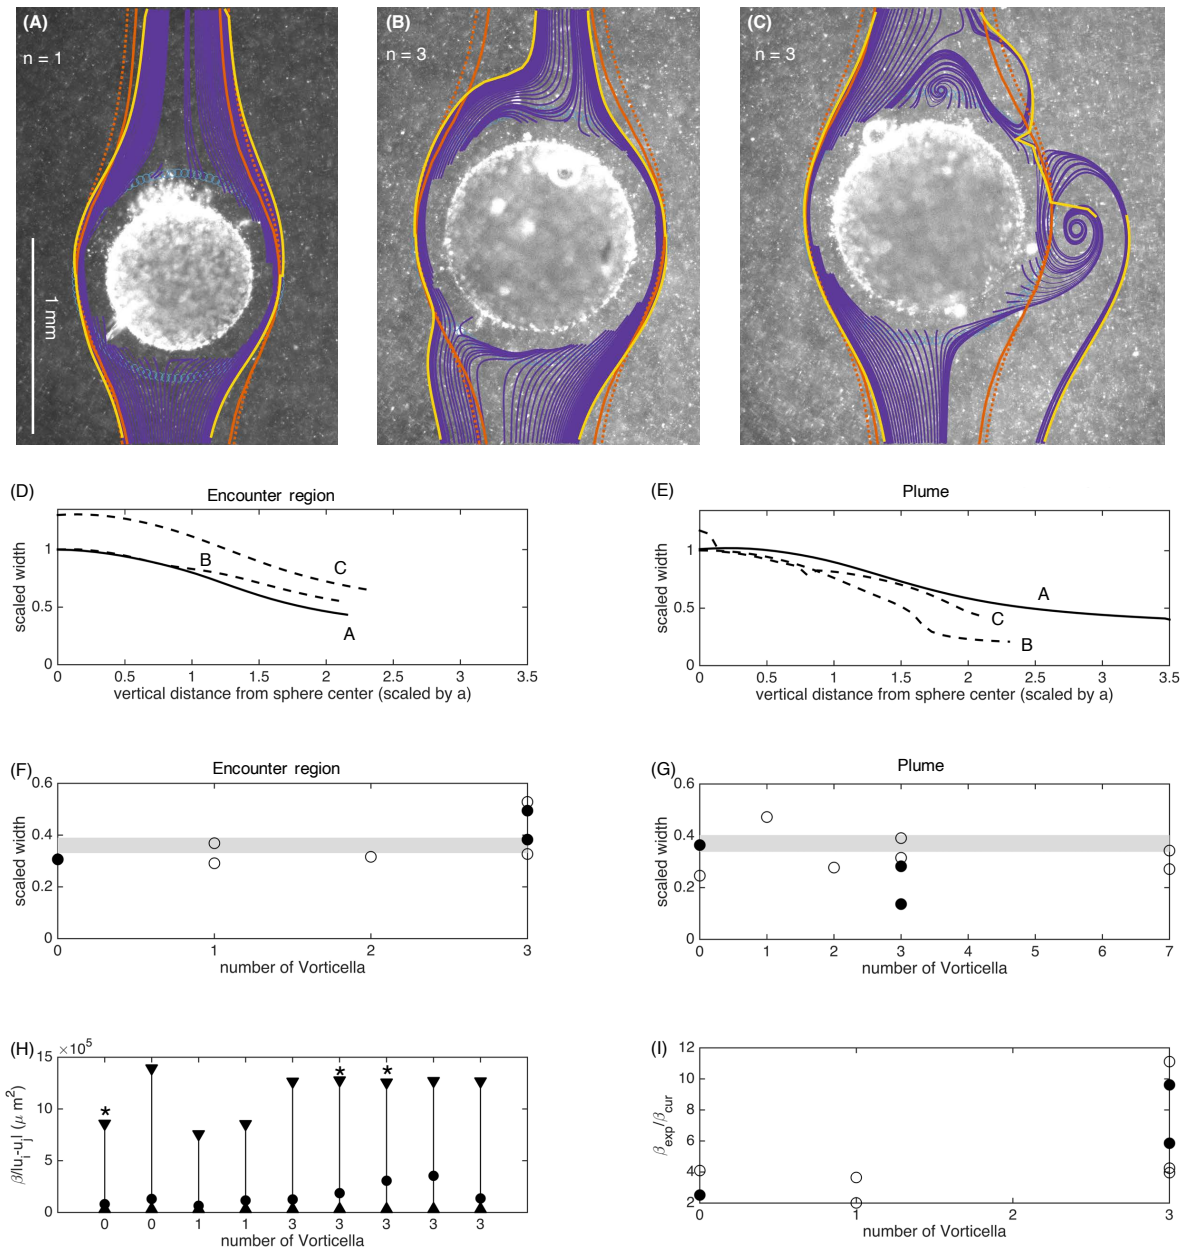

Figure 4



488 **Figure 4: Encounter region and plume of sinking aggregates.** (A-C) Streamlines  
489 around sinking aggregates (purple) calculated using experimentally-measured flow fields.  
490 Streamlines begin in a ring around the aggregate (blue circles) and are followed backward  
491 in time to find the encounter region for the aggregate (below the sphere) and forward in  
492 time to find the plume (above the sphere). Yellow lines indicates outer limits of these  
493 streamlines (e.g. the width of the plume and encounter region). Orange lines indicate  
494 theoretically calculated plume and encounter region widths, which were calculated for a  
495 sphere with matching radius and sinking speed. Of these, the solid lines indicate Stokes  
496 flow and dashed lines indicate Oseen flow. (D,E) Width of the intersection cross section  
497 and plume for the aggregates in panel (A) - (C). Letters indicate which panel matches  
498 which line and the solid line indicates that no *Vorticella* are attached. Widths are scaled  
499 by initial width at the equator of the sphere. (F,G) Long-distance encounter cross section  
500 and plume width ( $N = 9$  for encounter region and  $N = 10$  for plume). This width is  
501 calculated by continuing the experimentally-measured widths to  $y = \pm 20a$ . Solid circles  
502 indicate aggregates shown in panels (A) - (C) and shaded region indicates the range predicted  
503 by Oseen flow. (H,I) Particle coagulation kernels scaled by encounter velocity ( $N = 9$ ). (H):  
504 The rectangular (upper triangles), experimental (circles), and curvilinear (lower triangles)  
505 kernels are compared for the parameters of each experimental aggregate. Stars indicate  
506 aggregates shown in panels (A) - (C). (I): The experimental coagulation kernel,  $\beta_{exp}$ , divided  
507 by the curvilinear kernel,  $\beta_{cur}$  ( $N = 9$ ). This indicates by how much encounter rates would  
508 be increased in our measured flow versus using the assumptions of Stokes flow. Solid circles  
509 indicate aggregates shown in panels (A) - (C).

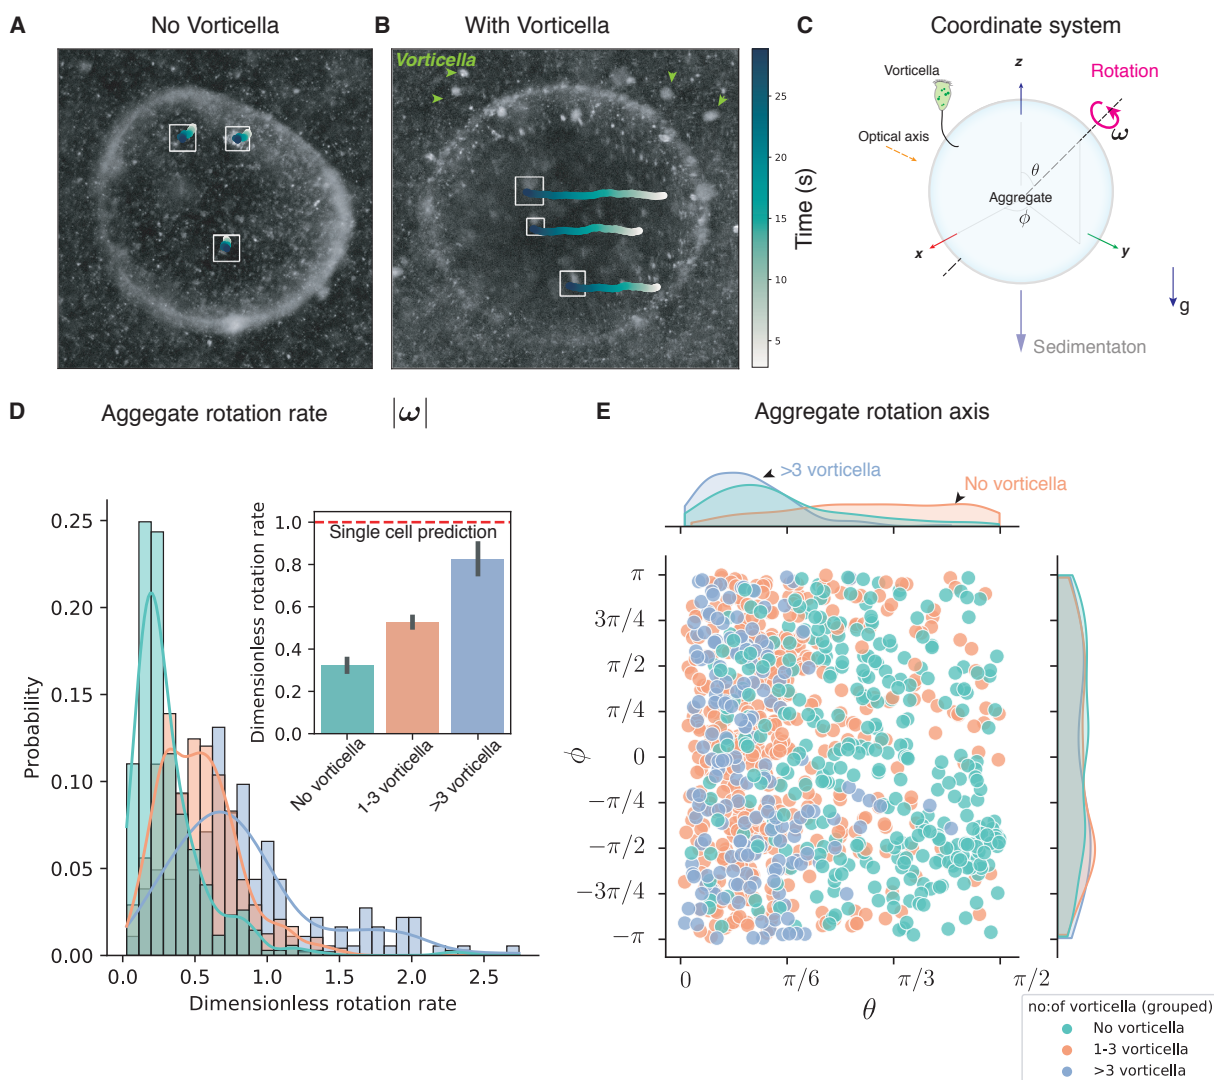

**Figure 5**

510 **Figure 5: Effect of *Vorticella* on rotational dynamics of sinking aggregates**  
 511 **(A)** and **(B)** Microscopy snapshots of aggregates without *Vorticella* and with  $n > 7$  *Vorti-*  
 512 *cella*, respectively, with tracks of surface features overlaid. Green arrows indicate *Vorticella*  
 513 locations in (B). Tracked surface features show significant excursion in (B) due to the ro-  
 514 tation of the aggregate. **(C)** Coordinate system for quantifying the rotational dynamics of  
 515 aggregates. Aggregate rotation rate is defined by  $\omega$  and the rotation axis by the polar and  
 516 azimuthal angle pairs  $(\theta, \phi)$ , respectively. **(D)** Comparison of mean rotation rates of aggre-

517 gates without and with *Vorticella*. Results are presented over  $N = 7$  distinct aggregates for  
518 the ‘no *Vorticella*’ condition and over  $N = 6$  aggregates for the ‘with *Vorticella*’ conditions.  
519 Aggregates with *Vorticella* show significantly larger rotation rates compared to those with-  
520 out *Vorticella* (Kruskal-Wallis test comparing the three conditions  $\chi^2(3) = 257, P < 10^{-6}$  ).  
521 The red-dashed line shows the theoretical rotation rate for an aggregate based on a single  
522 *Vorticella*. **(E)** Joint-distribution of the angles that define the axis of rotation. Aggregates  
523 without *Vorticella* show a relatively uniform distribution signifying random rotation axis,  
524 while aggregates with *Vorticella* tend to rotate about axes that are parallel to the axis of  
525 gravity.

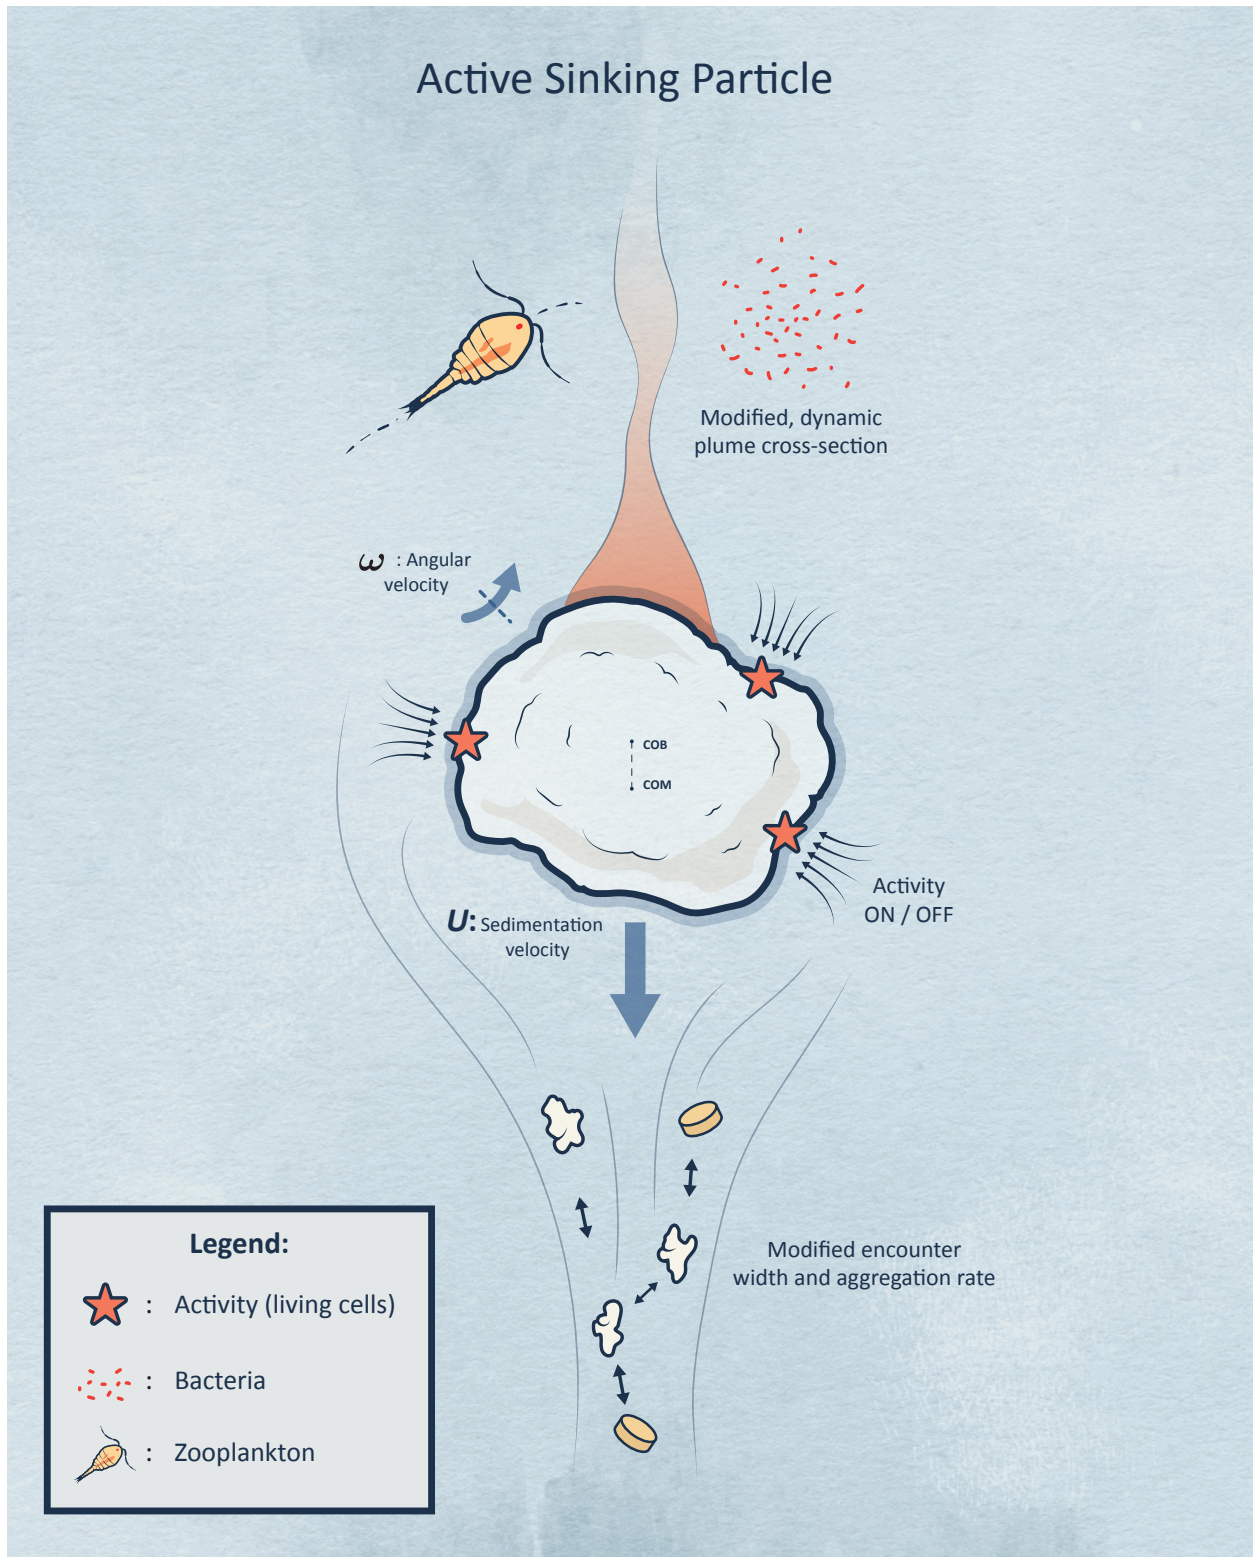

Figure 6



526 **Figure 6:** Our results support a new paradigm for “active sinking particles”, compared  
527 to the previous view of particles that passively sink with no active hydrodynamic interactions.

## 528 References

- 529 [1] Alldredge, A. L. & Silver, M. W. Characteristics, dynamics and significance of marine  
530 snow. *Progress in Oceanography* **20**, 41–82 (1988). URL [http://www.sciencedirect.  
531 com/science/article/pii/0079661188900535](http://www.sciencedirect.com/science/article/pii/0079661188900535).
- 532 [2] Simon, M., Grossart, H.-P., Schweitzer, B. & Ploug, H. Microbial ecology of organic  
533 aggregates in aquatic ecosystems. *Aquatic microbial ecology* **28**, 175–211 (2002).
- 534 [3] Droppo, I. G. & Ongley, E. D. Flocculation of suspended sediment in rivers of south-  
535 eastern Canada. *Water Research* **28**, 1799–1809 (1994). Publisher: Elsevier.
- 536 [4] Grossart, H.-P. & Simon, M. Limnetic macroscopic organic aggregates (lake snow):  
537 Occurrence, characteristics, and microbial dynamics in Lake Constance. *Limnology and  
538 Oceanography* **38**, 532–546 (1993). Publisher: Wiley Online Library.
- 539 [5] Alldredge, A. L. & Gotschalk, C. In situ settling behavior of marine snow. *Limnology  
540 and Oceanography* **33**, 339–351 (1988). URL [http://onlinelibrary.wiley.com/doi/  
541 10.4319/lo.1988.33.3.0339/abstract](http://onlinelibrary.wiley.com/doi/10.4319/lo.1988.33.3.0339/abstract).
- 542 [6] Kiørboe, T., Ploug, H. & Thygesen, U. H. Fluid motion and solute distribution around  
543 sinking aggregates. i. small-scale fluxes and heterogeneity of nutrients in the pelagic  
544 environment. *Mar. Ecol. Prog. Ser.* **211**, 1–13 (2001).
- 545 [7] Kiørboe, T. Formation and fate of marine snow: Small-scale processes with large-scale  
546 implications. *Sci. Mar.* **65**, 57–71 (2001).
- 547 [8] Srivastava, A., Seo, S.-H., Ko, S.-R., Ahn, C.-Y. & Oh, H.-M. Bioflocculation in natu-  
548 ral and engineered systems: current perspectives. *Critical Reviews in Biotechnology* **38**,

- 549 1176–1194 (2018). URL <https://doi.org/10.1080/07388551.2018.1451984>. Pub-  
550 lisher: Taylor & Francis eprint: <https://doi.org/10.1080/07388551.2018.1451984>.
- 551 [9] Burd, A. B. & Jackson, G. A. Particle aggregation. *Annual review of marine science*  
552 **1**, 65–90 (2009). Publisher: Annual Reviews.
- 553 [10] Humphries, S. Filter feeders and plankton increase particle encounter rates through  
554 flow regime control. *Proc. Natl. Acad. Sci. U. S. A.* **106**, 7882–7887 (2009).
- 555 [11] Silver, M. W., Gowing, M. M., Brownlee, D. C. & Corliss, J. O. Ciliated protozoa  
556 associated with oceanic sinking detritus. *Nature* **309**, 246–248 (1984). URL <https://link.springer.com/article/10.1038/309246a0>.  
557 <https://link.springer.com/article/10.1038/309246a0>.
- 558 [12] KiØrboe, T. Colonization of marine snow aggregates by invertebrate zooplankton:  
559 Abundance, scaling, and possible role. *Limnology and Oceanography* **45**, 479–484  
560 (2000). URL [http://onlinelibrary.wiley.com/doi/10.4319/lo.2000.45.2.0479/](http://onlinelibrary.wiley.com/doi/10.4319/lo.2000.45.2.0479/abstract)  
561 [abstract](http://onlinelibrary.wiley.com/doi/10.4319/lo.2000.45.2.0479/abstract).
- 562 [13] Artolozaga, I. *et al.* Spatial distribution of protists in the presence of  
563 macroaggregates in a marine system. *FEMS Microbiology Ecology* **33**, 191–  
564 196 (2000). URL [https://academic.oup.com/femsec/article/33/3/191/504828/](https://academic.oup.com/femsec/article/33/3/191/504828/Spatial-distribution-of-protists-in-the-presence)  
565 [Spatial-distribution-of-protists-in-the-presence](https://academic.oup.com/femsec/article/33/3/191/504828/Spatial-distribution-of-protists-in-the-presence).
- 566 [14] Stocker, R. Marine microbes see a sea of gradients. *Science* **338**, 628–633 (2012). URL  
567 <http://www.sciencemag.org/content/338/6107/628.short>.
- 568 [15] Zimmermann-Timm, H., Holst, H., Müller, S. & Muller, S. Seasonal dynamics of ag-  
569 gregates and their typical biocoenosis in the elbe estuary. *Estuaries* **21**, 613 (1998).
- 570 [16] Federation, W. E. *Wastewater Biology: The Microlife* (Water Environment Federation,  
571 Alexandria, VA, USA, 2017), 3rd edition edn.

- 572 [17] Foissner, W. Protists as bioindicators in activated sludge: Identification, ecology and  
573 future needs. *Eur. J. Protistol.* **55**, 75–94 (2016).
- 574 [18] Fukuda, H. & Koike, I. Feeding currents of particle-attached nanoflagellates a novel  
575 mechanism for aggregation of submicron particles. *Marine Ecology Progress Series* **202**,  
576 101–112 (2000).
- 577 [19] Ryu, S., Pepper, R. E., Nagai, M. & France, D. C. Vorticella: A protozoan for Bio-  
578 Inspired engineering. *Micromachines* **8**, 4 (2016).
- 579 [20] Hartmann, C., Ozmutlu, O., Petermeier, H., Fried, J. & Delgado, A. Analysis of the flow  
580 field induced by the sessile peritrichous ciliate opercularia asymmetrica. *J. Biomech.*  
581 **40**, 137–148 (2007).
- 582 [21] Shanks, A. L. & Trent, J. D. Marine snow: sinking rates and potential role in vertical  
583 flux. *Deep Sea Res. A* **27**, 137–143 (1980).
- 584 [22] Hawley, N. Settling velocity distribution of natural aggregates. *J. Geophys. Res.* **87**,  
585 9489 (1982).
- 586 [23] Ploug, H. & Jørgensen, B. B. A net-jet flow system for mass transfer and microsensor  
587 studies of sinking aggregates. *Mar. Ecol. Prog. Ser.* **176**, 279–290 (1999).
- 588 [24] Krishnamurthy, D. *et al.* Scale-free vertical tracking microscopy. *Nat. Methods* (2020).
- 589 [25] Liron, N. & Blake, J. R. Existence of Viscous Eddies Near Boundaries. *Journal of Fluid*  
590 *Mechanics* **107**, 109–129 (1981).
- 591 [26] Pepper, R. E. *et al.* A New Angle on Microscopic Suspension Feeders near Boundaries.  
592 *Biophysical Journal* **105**, 1796–1804 (2013).
- 593 [27] Pepper, R. E. *et al.* The effect of external flow on the feeding currents of sessile mi-  
594 croorganisms. *J. R. Soc. Interface* **18**, 20200953 (2021).

- 595 [28] Leal, L. G. *Advanced transport phenomena: fluid mechanics and convective transport*  
596 *processes*, vol. 7 (Cambridge University Press, 2007).
- 597 [29] Jackson, G. A. Effect of coagulation on a model planktonic food web. *Deep Sea Research*  
598 *Part I: Oceanographic Research Papers* **48**, 95–123 (2001). Publisher: Elsevier.
- 599 [30] Jackson, G. A. & Burd, A. B. Simulating aggregate dynamics in ocean biogeo-  
600 chemical models. *Progress in Oceanography* **133**, 55–65 (2015). URL <https://www.sciencedirect.com/science/article/pii/S0079661114001451>.  
601
- 602 [31] Visser, A. W. & Jackson, G. A. Characteristics of the chemical plume behind a sinking  
603 particle in a turbulent water column. *Mar. Ecol. Prog. Ser.* **283**, 55–71 (2004).
- 604 [32] Kiørboe, T. & Jackson, G. A. Marine snow, organic solute plumes, and optimal  
605 chemosensory behavior of bacteria. *Limnol. Oceanogr.* **46**, 1309–1318 (2001).
- 606 [33] Kanso, E. A., Lopes, R. M., Strickler, J. R., Dabiri, J. O. & Costello, J. H. Teamwork  
607 in the viscous oceanic microscale. *Proceedings of the National Academy of Sciences* **118**  
608 (2021).
- 609 [34] Karp-Boss, L., Boss, E. & Jumars, P. A. NUTRIENT FLUXES TO PLANKTONIC  
610 OSMOTROPHS IN THE PRESENCE OF FLUID MOTION. *Oceanogr. Mar. Biol. Annu. Rev.* **34**, 71–107 (1996).  
611
- 612 [35] Jackson, G. A. & Kiørboe, T. Zooplankton use of chemodetection to find and eat  
613 particles. *Mar. Ecol. Prog. Ser.* **269**, 153–162 (2004).
- 614 [36] Lombard, F., Koski, M. & Kiørboe, T. Copepods use chemical trails to find sinking  
615 marine snow aggregates. *Limnol. Oceanogr.* **58**, 185–192 (2013).
- 616 [37] Batchelor, G. K. *An Introduction to Fluid Dynamics* (Cambridge University Press,  
617 2000).



- 618 [38] Magar, V. Nutrient uptake by a Self-Propelled steady squirmer (2003).
- 619 [39] Batchelor, G. K. Mass transfer from small particles suspended in turbulent fluid. *J.*  
620 *Fluid Mech.* **98**, 609–623 (1980).
- 621 [40] Li, X. & Logan, B. E. Collision frequencies of fractal aggregates with small particles by  
622 differential sedimentation. *Environmental science & technology* **31**, 1229–1236 (1997).  
623 Publisher: ACS Publications.
- 624 [41] Li, X.-y. & Yuan. Collision Frequencies of Microbial Aggregates with Small Particles by  
625 Differential Sedimentation. *Environmental Science & Technology* **36**, 387–393 (2002).  
626 URL <https://doi.org/10.1021/es010681d>. Publisher: American Chemical Society.
- 627 [42] Christensen-Dalsgaard, K. K. & Fenchel, T. Increased filtration efficiency of attached  
628 compared to free-swimming flagellates. *Aquatic microbial ecology* **33**, 77–86 (2003).  
629 URL <http://www.int-res.com/abstracts/ame/v33/n1/p77-86/>.
- 630 [43] Andersen, A. & Kiørboe, T. The effect of tethering on the clearance rate of suspension-  
631 feeding plankton. *Proceedings of the National Academy of Sciences* **117**, 30101–30103  
632 (2020). Publisher: National Acad Sciences.
- 633 [44] Alldredge, A. L., Granata, T. C., Gotschalk, C. C. & Dickey, T. D. The physical  
634 strength of marine snow and its implications for particle disaggregation in the ocean.  
635 *Limnol. Oceanogr.* **35**, 1415–1428 (1990).
- 636 [45] Takeuchi, M. *et al.* Turbulence mediates marine aggregate formation and destruction  
637 in the upper ocean. *Sci. Rep.* **9**, 16280 (2019).
- 638 [46] Menden-Deuer, S. & Kiørboe, T. HORIZONS small bugs with a big impact: linking  
639 plankton ecology with ecosystem processes. *J. Plankton Res.* **38**, 1036–1043 (2016).

- 640 [47] Litchman, E., Ohman, M. D. & Kiørboe, T. Trait-based approaches to zooplankton  
641 communities. *Journal of plankton research* **35**, 473–484 (2013). Publisher: Oxford  
642 University Press.
- 643 [48] Kiørboe, T. *A Mechanistic Approach to Plankton Ecology* (Princeton University Press,  
644 Princeton, 2008), illustrated edition edn.
- 645 [49] Cronenberg, C. C. H. & Van den Heuvel, J. C. Determination of glucose diffusion  
646 coefficients in biofilms with micro-electrodes. *Biosensors and Bioelectronics* **6**, 255–262  
647 (1991).
- 648 [50] Vacchiano, E. J., Kut, J. L., Wyatt, M. L. & Buhse, H. E. A novel method for mass-  
649 culturing vorticella. *J. Protozool.* **38**, 609–613 (1991).
- 650 [51] Thielicke, W. & Stamhuis, E. PIVlab – towards user-friendly, affordable and accurate  
651 digital particle image velocimetry in MATLAB. *Journal of Open Research Software* **2**,  
652 e30 (2014). URL [http://openresearchsoftware.metajnl.com/articles/10.5334/  
653 jors.bl/](http://openresearchsoftware.metajnl.com/articles/10.5334/jors.bl/).
- 654 [52] D. Krishnamurthy, M. Prakash, R.E. Pepper. Data from: Active sinking parti-  
655 cles: Flow and transport dynamics due to sessile suspension feeders on sinking  
656 aggregates. Dryad Dataset (2021). URL [https://datadryad.org/stash/share/  
657 TW6rHTj5-Z5m2s2-dd0Z-ULAEPimuv0GdQx1C\\_NXE\\_E](https://datadryad.org/stash/share/TW6rHTj5-Z5m2s2-dd0Z-ULAEPimuv0GdQx1C_NXE_E).
- 658 [53] Schneider, C. A., Rasband, W. S. & Eliceiri, K. W. NIH image to ImageJ: 25 years of  
659 image analysis. *Nat. Methods* **9**, 671–675 (2012).
- 660 [54] Gilpin, W., Prakash, V. N. & Prakash, M. Flowtrace: Simple visualization of coherent  
661 structures in biological fluid flows. *J. Exp. Biol.* **220**, 3411–3418 (2017).

- 662 [55] Rode, M., Meucci, G., Seegert, K., Kiørboe, T. & Andersen, A. Effects of surface  
663 proximity and force orientation on the feeding flows of microorganisms on solid surfaces.  
664 *Physical Review Fluids* **5**, 123104 (2020).
- 665 [56] Berg, H. C. *Random Walks in Biology* (Princeton University Press, 1993), revised edn.
